# Supplementary material for: Aneuploidy screening of embryonic stem cell clones by metaphase karyotyping and droplet digital polymerase chain reaction
Source: PubMed Central journal article supplement (PMC4974727; doi:10.1186/s12860-016-0108-6), 2016-08-05

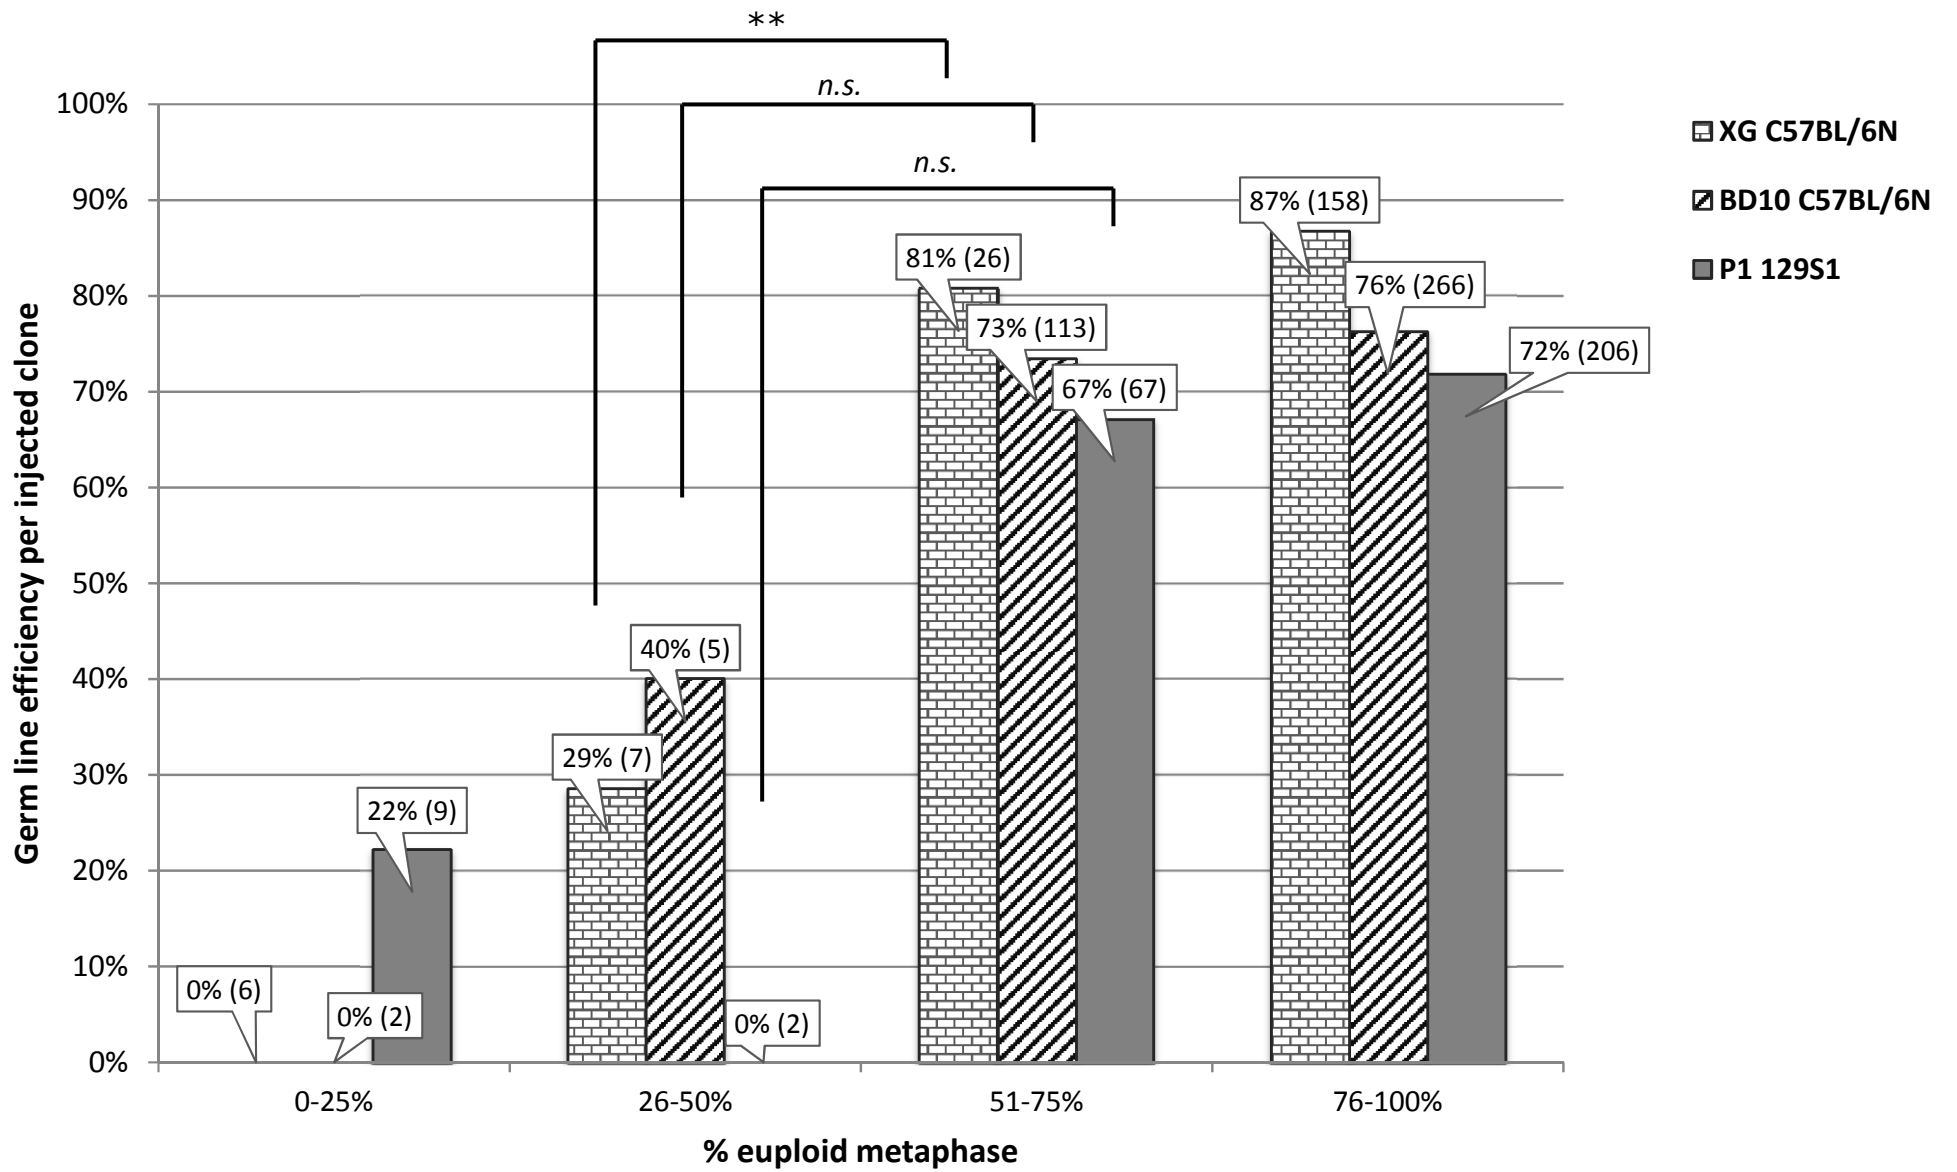

Supplement: 12860_2016_108_MOESM1_ESM.pdf [file 12860_2016_108_MOESM1_ESM.pdf]
